# Supplementary material
Source: publisher site journal article supplement (https://www.spandidos-publications.com/1880/downloadSupplementary)
Supplement: Supplementary file 1 [file downloadSupplementary]

## Sheet: 1 - Database
Serie	Title	Year	Source	Journal	PubMed ID	Authors	Citation	Ryyan_reason	Ryyan_decision	Progression from oral dysplasia to cancer	Progression_decision	Comments	Design	Class	Biomarker	Uniprot	Uniprot ID	Gene	Condition our outcome	Tech	Change	Reference (vs.)	n/N study group	n/N control group	n Condition our Outcome/n study group	n Condition our Outcome/n control group	Test name	Type of relative risk	Relative risk value	(95% CI)	p-value	Comments	Selected
1	A proteomic approach to compare saliva from individuals with and without oral leukoplakia.	2017	PubMed	J Proteomics. 2017 Jan 16;151:43-52. doi: 10.1016/j.jprot.2016.07.029. Epub 2016 Jul 29.	27478070	Camisasca DR, da RÃ³s GonÃ§alves L, Soares MR, Sandim V, Nogueira FC, Garcia CH, Santana R, de Oliveira SP, Buexm LA, de Faria PA, Dias FL, Pereira DA, Zingali RB, Alves G, LourenÃ§o SQ.	J Proteomics. 2017 Jan 16;151:43-52. doi: 10.1016/j.jprot.2016.07.029. Epub 2016 Jul 29.	2 - Out of goal	1 - Exclusion																								No
2	Clinicopathological parameters associated with histological background and recurrence after surgical intervention of vocal cord leukoplakia.	2017	Scopus	Medicine	28562558	Cui W, Xu W, Yang Q, Hu R.	Medicine (Baltimore). 2017 Jun;96(22):e7033. doi: 10.1097/MD.0000000000007033.	1 - Duplicated	1 - Exclusion																								No
3	Clinicopathological parameters associated with histological background and recurrence after surgical intervention of vocal cord leukoplakia	2017	PubMed	Medicine	28562558	Cui W, Xu W, Yang Q, Hu R.	Medicine (Baltimore). 2017 Jun;96(22):e7033. doi: 10.1097/MD.0000000000007033.	2 - Out of goal	1 - Exclusion																								No
4	Non-Invasive Techniques for Detection and Diagnosis of Oral Potentially Malignant Disorders.	2016	PubMed	The Tohoku journal of experimental medicine	26888696	Liu D, Zhao X, Zeng X, Dan H, Chen Q.	Tohoku J Exp Med. 2016 Feb;238(2):165-77. doi: 10.1620/tjem.238.165. Review.	3 - Wrong article type	1 - Exclusion																								No
5	Low prevalence of transcriptionally active human papilloma virus in Indian patients with HNSCC and leukoplakia.	2016	PubMed	Oral surgery, oral medicine, oral pathology and oral radiology	27765330	Bhosale PG, Pandey M, Desai RS, Patil A, Kane S, Prabhash K, Mahimkar MB.	Oral Surg Oral Med Oral Pathol Oral Radiol. 2016 Nov;122(5):609-618.e7. doi: 10.1016/j.oooo.2016.06.006. Epub 2016 Jun 22.	2 - Out of goal	1 - Exclusion																								No
6	Subcellular differential expression of Ep-ICD in oral dysplasia and cancer is associated with disease progression and prognosis.	2016	PubMed	BMC cancer	27421772	Somasundaram RT, Kaur J, Leong I, MacMillan C, Witterick IJ, Walfish PG, Ralhan R.	BMC Cancer. 2016 Jul 16;16:486. doi: 10.1186/s12885-016-2507-7.		2 - Inclusion	1 - No	1 - Exclusion	It is not possible to build interest groups																					No
7	Genetic Abnormalities in Oral Leukoplakia and Oral Cancer Progression.	2016	PubMed	Asian Pacific journal of cancer prevention : APJCP	27356725	Kil TJ, Kim HS, Kim HJ, Nam W, Cha IH.	Asian Pac J Cancer Prev. 2016;17(6):3001-6.	2 - Out of goal	1 - Exclusion																								No
8	Prognostic factors, predictive markers and cancer biology: the triad for successful oral cancer chemoprevention.	2016	PubMed	Future oncology (London, England)	27329013	Monteiro de Oliveira Novaes JA, William WN Jr.	Future Oncol. 2016 Oct;12(20):2379-86. doi: 10.2217/fon-2016-0168. Epub 2016 Jun 22. Review.	3 - Wrong article type	1 - Exclusion																								No
9	DNA methylation markers for oral pre-cancer progression: A critical review.	2016	PubMed	Oral oncology	26690652	Shridhar K, Walia GK, Aggarwal A, Gulati S, Geetha AV, Prabhakaran D, Dhillon PK, Rajaraman P.	Oral Oncol. 2016 Feb;53:1-9. doi: 10.1016/j.oraloncology.2015.11.012. Epub 2015 Dec 12. Review. Erratum in: Oral Oncol. 2016 Sep;60:e1.	3 - Wrong article type	1 - Exclusion																								No
10	Genetic variants in microRNA-146a (C>G) and microRNA-1269b (G>C) are associated with the decreased risk of oral premalignant lesions, oral cancer, and pharyngeal cancer	2016	Scopus	Archives of Oral Biology	27525378	Chen HC, Tseng YK, Chi CC, Chen YH, Yang CM, Huang SJ, Lee YC, Liou HH, Tsai KW, Ger LP.	Arch Oral Biol. 2016 Dec;72:21-32. doi: 10.1016/j.archoralbio.2016.08.010. Epub 2016 Aug 8.		2 - Inclusion	1 - No	1 - Exclusion	It is not possible to build interest groups																					No
11	Associations among Glutathione S-Transferase T1, M1, and P1 Polymorphisms and the Risk of Oral Leukoplakia	2016	Scopus	Genetic Testing and Molecular Biomarkers	27152506	He P, Wei M, Wang Y, Liu Q.	Genet Test Mol Biomarkers. 2016 Jun;20(6):312-21. doi: 10.1089/gtmb.2015.0308.	2 - Out of goal	1 - Exclusion																								No
12	Hepatic Angiosarcoma with Dyskeratosis Congenita.	2015	PubMed	Internal medicine (Tokyo, Japan)	26568000	Horiguchi N, Kakizaki S, Iizuka K, Hagiwara S, Ohyama T, Yamazaki Y, Shibusawa N, Sato K, Kusano M, Nakazato Y, Yamada M.	Intern Med. 2015;54(22):2867-72. doi: 10.2169/internalmedicine.54.5206. Epub 2015 Nov 15.	2 - Out of goal	1 - Exclusion																								No
13	Fibroblast Growth Factor (FGF-2) and Its Receptors FGFR-2 and FGFR-3 May Be Putative Biomarkers of Malignant Transformation of Potentially Malignant Oral Lesions into Oral Squamous Cell Carcinoma.	2015	PubMed	PloS one	26465941	Nayak S, Goel MM, Makker A, Bhatia V, Chandra S, Kumar S, Agarwal SP.	PLoS One. 2015 Oct 14;10(10):e0138801. doi: 10.1371/journal.pone.0138801. eCollection 2015.		2 - Inclusion	1 - No	1 - Exclusion	It is not possible to build interest groups																					No
14	Multivariate analyses of Ki-67, cytokeratin 13 and cytokeratin 17 in diagnosis and prognosis of oral precancerous lesions	2015	Scopus	Journal of Oral Pathology and Medicine	25243470	Yagyuu T, Obayashi C, Ueyama Y, Takano M, Tanaka Y, Kawaguchi M3, Takeda M, Kasai T, Kirita T.	J Oral Pathol Med. 2015 Aug;44(7):523-31. doi: 10.1111/jop.12262. Epub 2014 Sep 22.		2 - Inclusion	1 - No	1 - Exclusion	It is not possible to build interest groups																					No
15	E-cadherin as a potential biomarker of malignant transformation in oral leukoplakia: a retrospective cohort study.	2014	PubMed	BMC cancer	25518919	von Zeidler SV, de Souza Botelho T, MendonÃ§a EF, Batista AC.	BMC Cancer. 2014 Dec 17;14:972. doi: 10.1186/1471-2407-14-972.	2 - Out of goal	1 - Exclusion																								No
16	Risk stratification of early stage oral tongue cancers based on HPV status and p16 immunoexpression.	2014	PubMed	Asian Pacific journal of cancer prevention : APJCP	25339028	Ramshankar V, Soundara VT, Shyamsundar V, Ramani P, Krishnamurthy A.	Asian Pac J Cancer Prev. 2014;15(19):8351-9.	2 - Out of goal	1 - Exclusion																								No
17	Recurrent genomic alterations in sequential progressive leukoplakia and oral cancer: drivers of oral tumorigenesis?	2014	PubMed	Human molecular genetics	24403051	Cervigne NK, Machado J, Goswami RS, Sadikovic B, Bradley G, Perez-Ordonez B, Galloni NN, Gilbert R, Gullane P, Irish JC, Jurisica I, Reis PP, Kamel-Reid S.	Hum Mol Genet. 2014 May 15;23(10):2618-28. doi: 10.1093/hmg/ddt657. Epub 2014 Jan 8.	2 - Out of goal	1 - Exclusion																								No
18	Investigation of p16(INK4a) as a prognostic biomarker in oral epithelial dysplasia.	2014	PubMed	Journal of oral pathology & medicine : official publication of the International Association of Oral Pathologists and the American Academy of Oral Pathology	24372672	Nankivell P, Williams H, Webster K, Pearson D, High A, MacLennan K, Senguven B, McConkey C, Rabbitts P, Mehanna H.	J Oral Pathol Med. 2014 Apr;43(4):245-9. doi: 10.1111/jop.12128. Epub 2013 Dec 26.	2 - Out of goal	1 - Exclusion																								No
19	S100A7 overexpression is a predictive marker for high risk of malignant transformation in oral dysplasia.	2014	PubMed	International journal of cancer	24122701	Kaur J, Matta A, Kak I, Srivastava G, Assi J, Leong I, Witterick I, Colgan TJ, Macmillan C, Siu KW, Walfish PG, Ralhan R.	Int J Cancer. 2014 Mar 15;134(6):1379-88. doi: 10.1002/ijc.28473. Epub 2013 Oct 8.		2 - Inclusion	2 - Yes	2 - Inclusion		1 - Retrospective	1 - Prognostic	S100A7	Protein S100-A7	P31151	S100A7	Malignant transformation	Immunohistochemistry (IHC)	1 - Up-regulated (+)	Cytoplasmic S100A7 overexpression (+) vs. low (-)	70/110	40/110	32/70	7/40	Cox proportional hazards model	Hazard ratio (hazard rate)	2.36	0.9-8.4	0.041	Confidence interval error	No
19	S100A7 overexpression is a predictive marker for high risk of malignant transformation in oral dysplasia.	2014	PubMed	International journal of cancer	24122701	Kaur J, Matta A, Kak I, Srivastava G, Assi J, Leong I, Witterick I, Colgan TJ, Macmillan C, Siu KW, Walfish PG, Ralhan R.	Int J Cancer. 2014 Mar 15;134(6):1379-88. doi: 10.1002/ijc.28473. Epub 2013 Oct 8.		2 - Inclusion	2 - Yes	2 - Inclusion		1 - Retrospective	1 - Prognostic	Dysplasia (grade)	NA	NA	NA	Malignant transformation	Histopathology	1 - Up-regulated (+)	Moderate vs. mild dysplasia	39/97	58/97	18/39	12/58	Cox proportional hazards model	Hazard ratio (hazard rate)	2.54	1.6–10.8	0.013		Yes
19	S100A7 overexpression is a predictive marker for high risk of malignant transformation in oral dysplasia.	2014	PubMed	International journal of cancer	24122701	Kaur J, Matta A, Kak I, Srivastava G, Assi J, Leong I, Witterick I, Colgan TJ, Macmillan C, Siu KW, Walfish PG, Ralhan R.	Int J Cancer. 2014 Mar 15;134(6):1379-88. doi: 10.1002/ijc.28473. Epub 2013 Oct 8.		2 - Inclusion	2 - Yes	2 - Inclusion		1 - Retrospective	1 - Prognostic	Dysplasia (grade)	NA	NA	NA	Malignant transformation	Histopathology	1 - Up-regulated (+)	Severe vs. mild dysplasia	13/71	58/71	9/13	12/58	Cox proportional hazards model	Hazard ratio (hazard rate)	5.42	2.6–23.2	<0.001		Yes
20	Is there any benefit in surgery for potentially malignant disorders of the oral cavity?	2014	PubMed	Journal of oral pathology & medicine : official publication of the International Association of Oral Pathologists and the American Academy of Oral Pathology	23750566	Balasundaram I, Payne KF, Al-Hadad I, Alibhai M, Thomas S, Bhandari R.	J Oral Pathol Med. 2014 Apr;43(4):239-44. doi: 10.1111/jop.12088. Epub 2013 Jun 10. Review.	3 - Wrong article type	1 - Exclusion																								No
21	Association and prognostic value of serum inflammation markers in patients with leukoplakia and oral cavity cancer.	2013	PubMed	Clinical chemistry and laboratory medicine	23154424	Chang PY, Kuo YB, Wu TL, Liao CT, Sun YC, Yen TC, Chan EC.	Clin Chem Lab Med. 2013 Jun;51(6):1291-300. doi: 10.1515/cclm-2012-0504.		2 - Inclusion	1 - No	1 - Exclusion	It is not possible to build interest groups																					No
22	Expression of cancer stem cell markers ALDH1 and Bmi1 in oral erythroplakia and the risk of oral cancer.	2013	PubMed	Journal of oral pathology & medicine : official publication of the International Association of Oral Pathologists and the American Academy of Oral Pathology	22725270	Feng JQ, Xu ZY, Shi LJ, Wu L, Liu W, Zhou ZT.	J Oral Pathol Med. 2013 Feb;42(2):148-53. doi: 10.1111/j.1600-0714.2012.01191.x. Epub 2012 Jun 23.		2 - Inclusion	2 - Yes	2 - Inclusion		1 - Retrospective	1 - Prognostic	ALDH1	Retinal dehydrogenase 1	P00352	ALDH1A1	Malignant transformation	Immunohistochemistry (IHC)	1 - Up-regulated (+)	ALDH1 positive (+) vs. negative (-)	19/34	15/34	14/19	3/15	Logistic regression	Odds ratio	8.89	1.67-47.41	0.011		Yes
23	Tetraspanins CD9 and CD151, epidermal growth factor receptor and cyclooxygenase-2 expression predict malignant progression in oral epithelial dysplasia.	2013	PubMed	British journal of cancer	24201754	Nankivell P, Williams H, McConkey C, Webster K, High A, MacLennan K, Senguven B, Rabbitts P, Mehanna H.	Br J Cancer. 2013 Nov 26;109(11):2864-74. doi: 10.1038/bjc.2013.600. Epub 2013 Nov 7.		2 - Inclusion	1 - No	1 - Exclusion	It is not possible to build interest groups																					No
24	Molecular screening of oral precancer.	2013	PubMed	Oral oncology	24120275	Graveland AP, Bremmer JF, de Maaker M, Brink A, Cobussen P, Zwart M, Braakhuis BJ, Bloemena E, van der Waal I, Leemans CR, Brakenhoff RH.	Oral Oncol. 2013 Dec;49(12):1129-35. doi: 10.1016/j.oraloncology.2013.09.005. Epub 2013 Oct 9.	2 - Out of goal	1 - Exclusion																								No
25	Associations of periodontitis and oral manifestations with CD4 counts in human immunodeficiency virus-pregnant women in Thailand.	2013	PubMed	Oral surgery, oral medicine, oral pathology and oral radiology	23790956	Pattrapornnan P, DeRouen TA.	Oral Surg Oral Med Oral Pathol Oral Radiol. 2013 Sep;116(3):306-12. doi: 10.1016/j.oooo.2013.04.016. Epub 2013 Jun 19.	2 - Out of goal	1 - Exclusion																								No
26	The relevance of EGFR overexpression for the prediction of the malignant transformation of oral leukoplakia.	2013	PubMed	Oncology reports	23784518	Ries J, Vairaktaris E, Agaimy A, Bechtold M, Gorecki P, Neukam FW, Nkenke E.	Oncol Rep. 2013 Sep;30(3):1149-56. doi: 10.3892/or.2013.2545. Epub 2013 Jun 19.	2 - Out of goal	1 - Exclusion																								No
27	Podoplanin expression in oral leukoplakia: tumorigenic role.	2013	PubMed	Oral oncology	23473850	de Vicente JC, Rodrigo JP, Rodriguez-Santamarta T, Lequerica-FernÃ¡ndez P, Allonca E, GarcÃ­a-Pedrero JM.	Oral Oncol. 2013 Jun;49(6):598-603. doi: 10.1016/j.oraloncology.2013.02.008. Epub 2013 Mar 7.		2 - Inclusion	2 - Yes	2 - Inclusion		1 - Retrospective	1 - Prognostic	Podoplanin	Podoplanin	Q86YL7	PDPN	Malignant transformation	Immunohistochemistry (IHC)	1 - Up-regulated (+)	Podoplanin expression score 2–3 (+) vs. 0–1 (-)	22/58	36/58	11/22	2/36	Cox proportional hazards model	Hazard ratio (hazard rate)	8.738	1.834-41.634	0.007		Yes
28	Expression patterns of cancer stem cell markers ALDH1 and CD133 correlate with a high risk of malignant transformation of oral leukoplakia.	2013	PubMed	International journal of cancer	22782852	Liu W, Wu L, Shen XM, Shi LJ, Zhang CP, Xu LQ, Zhou ZT.	Int J Cancer. 2013 Feb 15;132(4):868-74. doi: 10.1002/ijc.27720. Epub 2012 Jul 30.		2 - Inclusion	1 - No	2 - Inclusion		1 - Retrospective	1 - Prognostic	ALDH1	Aldehyde dehydrogenase, cytosolic 1	P00352	ALDH1A1	Malignant transformation	Immunohistochemistry (IHC)	1 - Up-regulated (+)	ALDH1 positive (+) vs. Negative (-)	54/141	87/141	26/54	11/76	Cox proportional hazards model	Hazard ratio (hazard rate)	4.17	1.96-8.90	<0.001		Yes
28	Expression patterns of cancer stem cell markers ALDH1 and CD133 correlate with a high risk of malignant transformation of oral leukoplakia.	2013	PubMed	International journal of cancer	22782852	Liu W, Wu L, Shen XM, Shi LJ, Zhang CP, Xu LQ, Zhou ZT.	Int J Cancer. 2013 Feb 15;132(4):868-74. doi: 10.1002/ijc.27720. Epub 2012 Jul 30.		2 - Inclusion	1 - No	2 - Inclusion		1 - Retrospective	1 - Prognostic	CD133	Prominin-1	O43490	PROM1	Malignant transformation	Immunohistochemistry (IHC)	1 - Up-regulated (+)	CD133 positive (+) vs. Negative (-)	32/141	109/141	19/32	18/109	Cox proportional hazards model	Hazard ratio (hazard rate)	2.86	1.48-5.55	0.002		Yes
28	Expression patterns of cancer stem cell markers ALDH1 and CD133 correlate with a high risk of malignant transformation of oral leukoplakia.	2013	PubMed	International journal of cancer	22782852	Liu W, Wu L, Shen XM, Shi LJ, Zhang CP, Xu LQ, Zhou ZT.	Int J Cancer. 2013 Feb 15;132(4):868-74. doi: 10.1002/ijc.27720. Epub 2012 Jul 30.		2 - Inclusion	1 - No	2 - Inclusion		1 - Retrospective	1 - Prognostic	Dysplasia (grade)	NA	NA	NA	Malignant transformation	Histopathology	1 - Up-regulated (+)	High vs low-grade dysplasia	32/141	109/141	13/32	24/109	Cox proportional hazards model	Hazard ratio (hazard rate)	2.36	1.16-4.79	0.018		Yes
29	XRCC1 Arg194Trp polymorphism is associated with oral cancer risk: Evidence from a meta-analysis	2013	Scopus	Tumor Biology	23681796	Zhang Y, Wang Y, Wu J, Li LJ.	Tumour Biol. 2013 Aug;34(4):2321-7. doi: 10.1007/s13277-013-0779-y. Epub 2013 May 17.	3 - Wrong article type	1 - Exclusion						CD133	CD133 isoform H																	No
30	Evaluation of MAGE-A expression and grade of dysplasia for predicting malignant progression of oral leukoplakia.	2012	PubMed	International journal of oncology	22751922	Ries J, Agaimy A, Vairaktaris E, Kwon Y, Neukam FW, Strassburg LH, Nkenke E.	Int J Oncol. 2012 Sep;41(3):1085-93. doi: 10.3892/ijo.2012.1532. Epub 2012 Jun 26.	2 - Out of goal	1 - Exclusion						Displasia(high grade)																		No
31	Increased expression of CK8 and CK18 in leukoplakia, oral submucous fibrosis, and oral squamous cell carcinoma: an immunohistochemistry study.	2012	PubMed	Oral surgery, oral medicine, oral pathology and oral radiology	22677743	Nanda KD, Ranganathan K, Devi U, Joshua E.	Oral Surg Oral Med Oral Pathol Oral Radiol. 2012 Feb;113(2):245-53. doi: 10.1016/j.tripleo.2011.05.034. Epub 2011 Aug 27.	2 - Out of goal	1 - Exclusion																								No
32	Coexpression of p53 and Ki 67 and lack of c-erbB2 expression in oral leukoplakias in India.	2012	PubMed	Brazilian oral research	22641442	Kumar P, Kane S, Rathod GP.	Braz Oral Res. 2012 May-Jun;26(3):228-34.	2 - Out of goal	1 - Exclusion																								No
33	Podoplanin expression in oral leukoplakia: prognostic value and clinicopathological implications.	2012	PubMed	Oral diseases	22471854	Kreppel M, Kreppel B, Drebber U, Wedemayer I, Rothamel D, ZÃ¶ller JE, Scheer M.	Oral Dis. 2012 Oct;18(7):692-9. doi: 10.1111/j.1601-0825.2012.01927.x. Epub 2012 Apr 4.	2 - Out of goal	1 - Exclusion																								No
34	Genetic characterization of vocal fold lesions: leukoplakia and carcinoma.	2012	PubMed	The Laryngoscope	22252855	Bartlett RS, Heckman WW, Isenberg J, Thibeault SL, Dailey SH.	Laryngoscope. 2012 Feb;122(2):336-42. doi: 10.1002/lary.22417. Epub 2012 Jan 17.	2 - Out of goal	1 - Exclusion																								No
35	Loss of DLC1 is an independent prognostic factor in patients with oral squamous cell carcinoma.	2012	PubMed	Modern pathology : an official journal of the United States and Canadian Academy of Pathology, Inc	22002576	Tripathi SC, Kaur J, Matta A, Gao X, Sun B, Chauhan SS, Thakar A, Shukla NK, Duggal R, Choudhary AR, DattaGupta S, Sharma MC, Ralhan R, Siu KW.	Mod Pathol. 2012 Jan;25(1):14-25. doi: 10.1038/modpathol.2011.145. Epub 2011 Oct 14.	2 - Out of goal	1 - Exclusion																								No
36	Unique FISH patterns associated with cancer progression of oral dysplasia.	2012	PubMed	Journal of dental research	21990607	Poh CF, Zhu Y, Chen E, Berean KW, Wu L, Zhang L, Rosin MP.	J Dent Res. 2012 Jan;91(1):52-7. doi: 10.1177/0022034511425676. Epub 2011 Oct 11.	2 - Out of goal	1 - Exclusion																								No
37	Histological and immunohistochemical evaluation of new epithelium after removal of oral leukoplakia with Nd:YAG laser treatment.	2012	PubMed	Lasers in medical science	21687980	Montebugnoli L, Frini F, Gissi DB, Gabusi A, Cervellati F, Foschini MP, Marchetti C.	Lasers Med Sci. 2012 Jan;27(1):205-10. doi: 10.1007/s10103-011-0941-y. Epub 2011 Jun 18.	2 - Out of goal	1 - Exclusion																								No
38	Expression of nonclassical molecule human leukocyte antigen-G in oral lesions.	2012	PubMed	American journal of otolaryngology	21035918	Fregonezi PA, Silva TG, SimÃµes RT, Moreau P, Carosella ED, KlÃ¤y CP, GonÃ§alves MA, Soares EG, Souto F, Donadi EA, Soares CP.	Am J Otolaryngol. 2012 Mar-Apr;33(2):193-8. doi: 10.1016/j.amjoto.2010.08.001. Epub 2010 Oct 29.	2 - Out of goal	1 - Exclusion																								No
39	Salivary IL-6 levels in oral leukoplakia with dysplasia and its clinical relevance to tobacco habits and periodontitis.	2011	PubMed	Clinical oral investigations	20563615	Sharma M, Bairy I, Pai K, Satyamoorthy K, Prasad S, Berkovitz B, Radhakrishnan R.	Clin Oral Investig. 2011 Oct;15(5):705-14. doi: 10.1007/s00784-010-0435-5. Epub 2010 Jun 19.	2 - Out of goal	1 - Exclusion																								No
40	Prognostic value of DNA ploidy status in patients with oral leukoplakia.	2011	PubMed	Oral oncology	21880540	Bremmer JF, Brakenhoff RH, Broeckaert MA, BeliÃ«n JA, Leemans CR, Bloemena E, van der Waal I, Braakhuis BJ.	Oral Oncol. 2011 Oct;47(10):956-60. doi: 10.1016/j.oraloncology.2011.07.025. Epub 2011 Aug 30.		2 - Inclusion	1 - No	1 - Exclusion	It is not possible to build interest groups																					No
41	Aberrant expression of p53, p16INK4a and Ki-67 as basic biomarker for malignant progression of oral leukoplakias.	2011	PubMed	Journal of oral pathology & medicine : official publication of the International Association of Oral Pathologists and the American Academy of Oral Pathology	21435003	Nasser W, Flechtenmacher C, Holzinger D, Hofele C, Bosch FX.	J Oral Pathol Med. 2011 Sep;40(8):629-35. doi: 10.1111/j.1600-0714.2011.01026.x. Epub 2011 Mar 25.	2 - Out of goal	1 - Exclusion																								No
42	Evaluation of salivary endothelin-1 levels in oral squamous cell carcinoma and oral leukoplakia.	2011	PubMed	Regulatory peptides	20727373	Hoffmann RR, Yurgel LS, Campos MM.	Regul Pept. 2011 Jan 17;166(1-3):55-8. doi: 10.1016/j.regpep.2010.08.006. Epub 2010 Aug 18.	2 - Out of goal	1 - Exclusion																								No
43	Epidermal growth factor receptor expression and gene copy number in the risk of oral cancer.	2010	PubMed	Cancer prevention research (Philadelphia, Pa.)	20570883	Taoudi Benchekroun M, Saintigny P, Thomas SM, El-Naggar AK, Papadimitrakopoulou V, Ren H, Lang W, Fan YH, Huang J, Feng L, Lee JJ, Kim ES, Hong WK, Johnson FM, Grandis JR, Mao L.	Cancer Prev Res (Phila). 2010 Jul;3(7):800-9. doi: 10.1158/1940-6207.CAPR-09-0163. Epub 2010 Jun 22.	2 - Out of goal	1 - Exclusion																								No
44	Clinicopathological features and immunohistochemical expression of p53, Ki-67, Mcm-2 and Mcm-5 in proliferative verrucous leukoplakia.	2010	PubMed	Journal of oral pathology & medicine : official publication of the International Association of Oral Pathologists and the American Academy of Oral Pathology	20412398	GouvÃªa AF, Vargas PA, Coletta RD, Jorge J, Lopes MA.	J Oral Pathol Med. 2010 Jul;39(6):447-52. doi: 10.1111/j.1600-0714.2010.00889.x. Epub 2010 Apr 14.	2 - Out of goal	1 - Exclusion																								No
45	Evaluation of cornulin, keratin 4, keratin 13 expression and grade of dysplasia for predicting malignant progression of oral leukoplakia.	2010	PubMed	Oral oncology	20036603	Schaaij-Visser TB, Bremmer JF, Braakhuis BJ, Heck AJ, Slijper M, van der Waal I, Brakenhoff RH.	Oral Oncol. 2010 Feb;46(2):123-7. doi: 10.1016/j.oraloncology.2009.11.012. Epub 2009 Dec 29.	2 - Out of goal	1 - Exclusion																								No
46	DeltaNp63 overexpression, alone and in combination with other biomarkers, predicts the development of oral cancer in patients with leukoplakia.	2009	PubMed	Clinical cancer research : an official journal of the American Association for Cancer Research	19773378	Saintigny P, El-Naggar AK, Papadimitrakopoulou V, Ren H, Fan YH, Feng L, Lee JJ, Kim ES, Hong WK, Lippman SM, Mao L.	Clin Cancer Res. 2009 Oct 1;15(19):6284-91. doi: 10.1158/1078-0432.CCR-09-0498. Epub 2009 Sep 22.		2 - Inclusion	1 - No	1 - Exclusion	It is not possible to build interest groups																					No
47	Heterogeneous ribonucleoprotein K is a marker of oral leukoplakia and correlates with poor prognosis of squamous cell carcinoma.	2009	PubMed	International journal of cancer	19548310	Matta A, Tripathi SC, DeSouza LV, Grigull J, Kaur J, Chauhan SS, Srivastava A, Thakar A, Shukla NK, Duggal R, DattaGupta S, Ralhan R, Michael Siu KW.	Int J Cancer. 2009 Sep 15;125(6):1398-406. doi: 10.1002/ijc.24517.	2 - Out of goal	1 - Exclusion																								No
48	Biomarkers in dysplasia of the oral cavity: a systematic review.	2009	PubMed	Oral oncology	19442563	Smith J, Rattay T, McConkey C, Helliwell T, Mehanna H.	Oral Oncol. 2009 Aug;45(8):647-53. doi: 10.1016/j.oraloncology.2009.02.006. Epub 2009 May 12. Review.	3 - Wrong article type	1 - Exclusion																								No
49	Podoplanin: a novel marker for oral cancer risk in patients with oral premalignancy.	2008	PubMed	Journal of clinical oncology : official journal of the American Society of Clinical Oncology	18202409	Kawaguchi H, El-Naggar AK, Papadimitrakopoulou V, Ren H, Fan YH, Feng L, Lee JJ, Kim E, Hong WK, Lippman SM, Mao L.	J Clin Oncol. 2008 Jan 20;26(3):354-60. doi: 10.1200/JCO.2007.13.4072.		2 - Inclusion	1 - No	1 - Exclusion	It is not possible to build interest groups																					No
50	Overexpression of p16INK4 is a reliable marker of human papillomavirus-induced oral high-grade squamous dysplasia.	2006	PubMed	Oral surgery, oral medicine, oral pathology, oral radiology, and endodontics	16831676	Cunningham LL Jr, Pagano GM, Li M, Tandon R, Holm SW, White DK, Lele SM.	Oral Surg Oral Med Oral Pathol Oral Radiol Endod. 2006 Jul;102(1):77-81. Epub 2006 Apr 24.	2 - Out of goal	1 - Exclusion																								No
51	Quantitative cell-cycle protein expression in oral cancer assessed by computer-assisted system.	2006	PubMed	Histology and histopathology	16598671	Soares CP, Zuanon JA, Teresa DB, Fregonezi PA, Neto CB, Oliveira MR, Donadi EA, Martinelli-KlÃ¤y CP, Soares EG.	Histol Histopathol. 2006 Jul;21(7):721-8. doi: 10.14670/HH-21.721.	2 - Out of goal	1 - Exclusion																								No
52	The significance of salivary interleukin 6 and tumor necrosis factor alpha in patients with oral leukoplakia.	2006	PubMed	Oral oncology	16324876	Brailo V, VuciÄ‡eviÄ‡-Boras V, CekiÄ‡-Arambasin A, Alajbeg IZ, MilenoviÄ‡ A, Lukac J.	Oral Oncol. 2006 Apr;42(4):370-3. Epub 2005 Dec 1.	2 - Out of goal	1 - Exclusion																								No
53	Risk markers of oral cancer in clinically normal mucosa as an aid in smoking cessation counseling.	2005	PubMed	Journal of clinical oncology : official journal of the American Society of Clinical Oncology	15774785	Sudbø J, Samuelsson R, Risberg B, Heistein S, Nyhus C, Samuelsson M, Puntervold R, Sigstad E, Davidson B, Reith A, Berner A.	J Clin Oncol. 2005 Mar 20;23(9):1927-33. Retraction in: J Clin Oncol. 2006 Dec 10;24(35):5621.	2 - Out of goal	1 - Exclusion																								No
54	Serum levels of folate, homocysteine, and vitamin B12 in head and neck squamous cell carcinoma and in laryngeal leukoplakia.	2005	PubMed	Cancer	15593092	Almadori G, Bussu F, Galli J, Cadoni G, Zappacosta B, Persichilli S, Minucci A, Giardina B, Maurizi M.	Cancer. 2005 Jan 15;103(2):284-92.	2 - Out of goal	1 - Exclusion																								No
55	Use of cytological specimens for p53 gene alteration detection in oral squamous cell carcinoma risk patients.	2004	PubMed	Clinical oncology (Royal College of Radiologists (Great Britain))	15341441	López M, Aguirre JM, Cuevas N, Anzola M, Videgain J, Aguirregaviria J, Castro A, de Pancorbo MM.	Clin Oncol (R Coll Radiol). 2004 Aug;16(5):366-70.	2 - Out of goal	1 - Exclusion																								No
56	Prognosis of oral pre-malignant lesions: significance of clinical, histopathological, and molecular biological characteristics.	2003	PubMed	Critical reviews in oral biology and medicine : an official publication of the American Association of Oral Biologists	12764019	Reibel J.	Crit Rev Oral Biol Med. 2003;14(1):47-62. Review.	3 - Wrong article type	1 - Exclusion																								No
57	Transforming growth factor-alpha: a surrogate endpoint biomarker?	2002	PubMed	Journal of the American College of Surgeons	12168960	Beenken SW, Hockett R Jr, Grizzle W, Weiss HL, Pickens A, Perloff M, Malone WF, Bland KI.	J Am Coll Surg. 2002 Aug;195(2):149-58.	2 - Out of goal	1 - Exclusion																								No
58	Chromosome instability in lymphocytes: A potential indicator of predisposition to oral premalignant lesions	2002	Scopus	Cancer Research	12019158	Wu X, Lippman SM, Lee JJ, Zhu Y, Wei QV, Thomas M, Hong WK, Spitz MR.	Cancer Res. 2002 May 15;62(10):2813-8.	2 - Out of goal	1 - Exclusion																								No
59	Development of difluoromethyl-ornithine and Bowman-Birk inhibitor as chemopreventive agents by assessment of relevant biomarker modulation: some lessons learned.	2001	PubMed	IARC scientific publications	11220668	Meyskens FL Jr.	IARC Sci Publ. 2001;154:49-55. Review.	3 - Wrong article type	1 - Exclusion																								No
60	Impact of localized treatment in reducing risk of progression of low-grade oral dysplasia: molecular evidence of incomplete resection.	2001	PubMed	Oral oncology	11435177	Zhang L, Poh CF, Lam WL, Epstein JB, Cheng X, Zhang X, Priddy R, Lovas J, Le ND, Rosin MP.	Oral Oncol. 2001 Sep;37(6):505-12.	2 - Out of goal	1 - Exclusion																								No
61	DNA content as a prognostic marker in patients with oral leukoplakia.	2001	PubMed	The New England journal of medicine	11320386	SudbÃ¸ J, Kildal W, Risberg B, Koppang HS, Danielsen HE, Reith A.	N Engl J Med. 2001 Apr 26;344(17):1270-8. Retraction in: Curfman GD, Morrissey S, Drazen JM. N Engl J Med. 2006 Nov 2;355(18):1927.	2 - Out of goal	1 - Exclusion																								No
62	Chromosome polysomy and histological characteristics in oral premalignant lesions.	2001	PubMed	Cancer epidemiology, biomarkers & prevention : a publication of the American Association for Cancer Research, cosponsored by the American Society of Preventive Oncology	11319171	Kim J, Shin DM, El-Naggar A, Lee JS, Corrales C, Lippman SM, Hong WK, Hittelman WN.	Cancer Epidemiol Biomarkers Prev. 2001 Apr;10(4):319-25.	2 - Out of goal	1 - Exclusion																								No
63	Proliferative verrucous leukoplakia of the gingiva.	2000	PubMed	Oral surgery, oral medicine, oral pathology, oral radiology, and endodontics	11113818	Fettig A, Pogrel MA, Silverman S Jr, Bramanti TE, Da Costa M, Regezi JA.	Oral Surg Oral Med Oral Pathol Oral Radiol Endod. 2000 Dec;90(6):723-30.	2 - Out of goal	1 - Exclusion																								No
64	Sanguinaria-associated oral leukoplakia: comparison with other benign and dysplastic leukoplakic lesions.	2000	PubMed	Oral surgery, oral medicine, oral pathology, oral radiology, and endodontics	10760727	Eversole LR, Eversole GM, Kopcik J.	Oral Surg Oral Med Oral Pathol Oral Radiol Endod. 2000 Apr;89(4):455-64.	2 - Out of goal	1 - Exclusion																								No
65	Lack of molecular markers to predict malignant potential of oral precancer.	2000	PubMed	The Journal of pathology	10699986	Warnakulasuriya S.	J Pathol. 2000 Mar;190(4):407-9.	3 - Wrong article type	1 - Exclusion																								No
66	Case-control study of plasma folate, homocysteine, vitamin B12, and cysteine as markers of cervical dysplasia	2000	Scopus	Cancer	10918169	Goodman MT, McDuffie K, Hernandez B, Wilkens LR, Selhub J.	Cancer. 2000 Jul 15;89(2):376-82.	2 - Out of goal	1 - Exclusion																								No
67	Genetic cancer susceptibility and DNA adducts: studies in smokers, tobacco chewers, and coke oven workers.	1999	PubMed	Cancer detection and prevention	10571654	Bartsch H, Rojas M, Nair U, Nair J, Alexandrov K.	Cancer Detect Prev. 1999;23(6):445-53.	2 - Out of goal	1 - Exclusion																								No
68	Leukoplakia: molecular understanding of pre-malignant lesions and implications for clinical management.	1997	PubMed	Molecular medicine today	9358471	Mao L.	Mol Med Today. 1997 Oct;3(10):442-8. Review.	3 - Wrong article type	1 - Exclusion																								No
69	Molecular analysis of oral lichen planus. A premalignant lesion?	1997	PubMed	The American journal of pathology	9250145	Zhang L, Michelsen C, Cheng X, Zeng T, Priddy R, Rosin MP.	Am J Pathol. 1997 Aug;151(2):323-7.	2 - Out of goal	1 - Exclusion																								No
70	Loss of p53 gene as a biomarker of high risk oral leukoplakias.	1997	PubMed	Indian journal of biochemistry & biophysics	9425746	Saranath D, Tandle AT, Deo MG, Mehta AR, Sanghvi V.	Indian J Biochem Biophys. 1997 Jun;34(3):266-73.	2 - Out of goal	1 - Exclusion																								No
71	Transforming growth factor-alpha overexpression in proliferative verrucous leukoplakia and oral squamous cell carcinoma: an immunohistochemical study.	1996	PubMed	Oral surgery, oral medicine, oral pathology, oral radiology, and endodontics	8843456	Kannan R, Bijur GN, Mallery SR, Beck FM, Sabourin CL, Jewell SD, Schuller DE, Stoner GD.	Oral Surg Oral Med Oral Pathol Oral Radiol Endod. 1996 Jul;82(1):69-74.	2 - Out of goal	1 - Exclusion																								No
72	Frequent microsatellite alterations at chromosomes 9p21 and 3p14 in oral premalignant lesions and their value in cancer risk assessment.	1996	PubMed	Nature medicine	8640560	Mao L, Lee JS, Fan YH, Ro JY, Batsakis JG, Lippman S, Hittelman W, Hong WK.	Nat Med. 1996 Jun;2(6):682-5.	2 - Out of goal	1 - Exclusion																								No
73	Risk biomarkers and current strategies for cancer chemoprevention.	1996	PubMed	Journal of cellular biochemistry. Supplement	9027592	Kelloff GJ, Boone CW, Crowell JA, Nayfield SG, Hawk E, Malone WF, Steele VE, Lubet RA, Sigman CC.	J Cell Biochem Suppl. 1996;25:1-14. Review.	3 - Wrong article type	1 - Exclusion																								No
74	Intraoral squamous cell carcinoma in human immunodeficiency virus infection. A clinicopathologic study.	1995	PubMed	Oral surgery, oral medicine, oral pathology, oral radiology, and endodontics	7552863	Flaitz CM, Nichols CM, Adler-Storthz K, Hicks MJ.	Oral Surg Oral Med Oral Pathol Oral Radiol Endod. 1995 Jul;80(1):55-62.	2 - Out of goal	1 - Exclusion																								No
75	Reduction in oral mucosa micronuclei frequency following alpha-tocopherol treatment of oral leukoplakia.	1994	PubMed	Cancer epidemiology, biomarkers & prevention : a publication of the American Association for Cancer Research, cosponsored by the American Society of Preventive Oncology	8118389	Benner SE, Wargovich MJ, Lippman SM, Fisher R, Velasco M, Winn RJ, Hong WK.	Cancer Epidemiol Biomarkers Prev. 1994 Jan-Feb;3(1):73-6.	2 - Out of goal	1 - Exclusion																								No
76	Progress in cancer chemoprevention: perspectives on agent selection and short-term clinical intervention trials.	1994	PubMed	Cancer research	8137331	Kelloff GJ, Boone CW, Steele VE, Crowell JA, Lubet R, Sigman CC.	Cancer Res. 1994 Apr 1;54(7 Suppl):2015s-2024s. Review.	3 - Wrong article type	1 - Exclusion																								No
77	Development of chemopreventive agents for lung and upper aerodigestive tract cancers.	1993	PubMed	Journal of cellular biochemistry. Supplement	8412195	Kelloff GJ, Boone CW, Steele VK, Perloff M, Crowell J, Doody LA.	J Cell Biochem Suppl. 1993;17F:2-17. Review.	3 - Wrong article type	1 - Exclusion																								No
78	Early genetic changes during upper aerodigestive tract tumorigenesis.	1993	PubMed	Journal of cellular biochemistry. Supplement	8412199	Hittelman WN, Voravud N, Shin DM, Lee JS, Ro JY, Hong WK.	J Cell Biochem Suppl. 1993;17F:233-6. Review.	2 - Out of goal	1 - Exclusion																								No
79	Clinical experience with the micronucleus assay.	1993	PubMed	Journal of cellular biochemistry. Supplement	8412196	Garewal HS, Ramsey L, Kaugars G, Boyle J.	J Cell Biochem Suppl. 1993;17F:206-12. Review.	3 - Wrong article type	1 - Exclusion																								No
80	Intermediate biomarkers in upper aerodigestive tract and lung chemoprevention trials.	1992	PubMed	Journal of cellular biochemistry. Supplement	1469903	Benner SE, Hong WK, Lippman SM, Lee JS, Hittelman WM.	J Cell Biochem Suppl. 1992;16G:33-8. Review.	3 - Wrong article type	1 - Exclusion																								No

## Sheet: 2 - Multivariate adjustment
Selected_article	Serie	Title	Year	Source	Journal	PubMed ID	Authors	Citation	Adjustment parameters	Type	Type of relative risk	Relative risk value	(95% CI)	p-value
1	19	S100A7 overexpression is a predictive marker for high risk of malignant transformation in oral dysplasia.	2014	PubMed	International journal of cancer	24122701	Kaur J, Matta A, Kak I, Srivastava G, Assi J, Leong I, Witterick I, Colgan TJ, Macmillan C, Siu KW, Walfish PG, Ralhan R.	Int J Cancer. 2014 Mar 15;134(6):1379-88. doi: 10.1002/ijc.28473. Epub 2013 Oct 8.	Age	Age	Hazard ratio (hazard rate)	NS	NS	NS
1	19	S100A7 overexpression is a predictive marker for high risk of malignant transformation in oral dysplasia.	2014	PubMed	International journal of cancer	24122701	Kaur J, Matta A, Kak I, Srivastava G, Assi J, Leong I, Witterick I, Colgan TJ, Macmillan C, Siu KW, Walfish PG, Ralhan R.	Int J Cancer. 2014 Mar 15;134(6):1379-88. doi: 10.1002/ijc.28473. Epub 2013 Oct 8.	Gender	Sex	Hazard ratio (hazard rate)	NS	NS	NS
1	19	S100A7 overexpression is a predictive marker for high risk of malignant transformation in oral dysplasia.	2014	PubMed	International journal of cancer	24122701	Kaur J, Matta A, Kak I, Srivastava G, Assi J, Leong I, Witterick I, Colgan TJ, Macmillan C, Siu KW, Walfish PG, Ralhan R.	Int J Cancer. 2014 Mar 15;134(6):1379-88. doi: 10.1002/ijc.28473. Epub 2013 Oct 8.	Site	Anatomical site	Hazard ratio (hazard rate)	NS	NS	NS
1	19	S100A7 overexpression is a predictive marker for high risk of malignant transformation in oral dysplasia.	2014	PubMed	International journal of cancer	24122701	Kaur J, Matta A, Kak I, Srivastava G, Assi J, Leong I, Witterick I, Colgan TJ, Macmillan C, Siu KW, Walfish PG, Ralhan R.	Int J Cancer. 2014 Mar 15;134(6):1379-88. doi: 10.1002/ijc.28473. Epub 2013 Oct 8.	Smoking history	Tobaco smoking	Hazard ratio (hazard rate)	NS	NS	NS
1	19	S100A7 overexpression is a predictive marker for high risk of malignant transformation in oral dysplasia.	2014	PubMed	International journal of cancer	24122701	Kaur J, Matta A, Kak I, Srivastava G, Assi J, Leong I, Witterick I, Colgan TJ, Macmillan C, Siu KW, Walfish PG, Ralhan R.	Int J Cancer. 2014 Mar 15;134(6):1379-88. doi: 10.1002/ijc.28473. Epub 2013 Oct 8.	p16 expression	Protein	Hazard ratio (hazard rate)	NS	NS	NS
2	22	Expression of cancer stem cell markers ALDH1 and Bmi1 in oral erythroplakia and the risk of oral cancer.	2013	PubMed	Journal of oral pathology & medicine : official publication of the International Association of Oral Pathologists and the American Academy of Oral Pathology	22725270	Feng JQ, Xu ZY, Shi LJ, Wu L, Liu W, Zhou ZT.	J Oral Pathol Med. 2013 Feb;42(2):148-53. doi: 10.1111/j.1600-0714.2012.01191.x. Epub 2012 Jun 23.	Bmi1 (positive vs. negative)	Protein	Logistic regression (odds ratio)	2.99	0.56–16.05	0.202
3	27	Podoplanin expression in oral leukoplakia: tumorigenic role.	2013	PubMed	Oral oncology	23473850	de Vicente JC, Rodrigo JP, Rodriguez-Santamarta T, Lequerica-FernÃ¡ndez P, Allonca E, GarcÃ­a-Pedrero JM.	Oral Oncol. 2013 Jun;49(6):598-603. doi: 10.1016/j.oraloncology.2013.02.008. Epub 2013 Mar 7.	Smoking	Tobaco smoking	Hazard ratio (hazard rate)	2.561	0.792-8.283	0.11
3	27	Podoplanin expression in oral leukoplakia: tumorigenic role.	2013	PubMed	Oral oncology	23473850	de Vicente JC, Rodrigo JP, Rodriguez-Santamarta T, Lequerica-FernÃ¡ndez P, Allonca E, GarcÃ­a-Pedrero JM.	Oral Oncol. 2013 Jun;49(6):598-603. doi: 10.1016/j.oraloncology.2013.02.008. Epub 2013 Mar 7.	Dysplasia (severe vs mild-moderate)	Dysplasia	Hazard ratio (hazard rate)	2.332	0.747-7.277	0.14
4	28	Expression patterns of cancer stem cell markers ALDH1 and CD133 correlate with a high risk of malignant transformation of oral leukoplakia.	2013	PubMed	International journal of cancer	22782852	Liu W, Wu L, Shen XM, Shi LJ, Zhang CP, Xu LQ, Zhou ZT.	Int J Cancer. 2013 Feb 15;132(4):868-74. doi: 10.1002/ijc.27720. Epub 2012 Jul 30.	ALDH1/CD133 Both expression	Protein	Hazard ratio (hazard rate)	NS	NS	NS
4	28	Expression patterns of cancer stem cell markers ALDH1 and CD133 correlate with a high risk of malignant transformation of oral leukoplakia.	2013	PubMed	International journal of cancer	22782852	Liu W, Wu L, Shen XM, Shi LJ, Zhang CP, Xu LQ, Zhou ZT.	Int J Cancer. 2013 Feb 15;132(4):868-74. doi: 10.1002/ijc.27720. Epub 2012 Jul 30.	ALDH1/CD133 Either expression	Protein	Hazard ratio (hazard rate)	NS	NS	NS

## Sheet: 3 - REMARK checklist
							REMARK
							Introduction	Materials and Methods										Results							Discussion
								Patiens		Specimen characteristics	Assay methods					Statistical analysis methods		Data		Analysis and presentation
							1	2	3	4	5	6	7	8	9	10	11	12	13	14	15	16	17	18	19	20
Serie	Title	Year	Authors	Citation	Biomarker	UniProt	State the marker examined, the study objectives, and any pre-specified hypotheses.	Describe the characteristics (e.g., disease stage or co-morbidities) of the study patients, including their source and inclusion and exclusion criteria.	Describe treatments received and how chosen (e.g., randomized or rule-based).	Describe type of biological material used (including control samples) and methods of preservation and storage.	Specify the assay method used and provide (or reference) a detailed protocol, including specific reagents or kits used, quality control procedures, reproducibility assessments, quantitation methods, and scoring and reporting protocols. Specify whether and how assays were performed blinded to the study endpoint.	State the method of case selection, including whether prospective or retrospective and whether stratification or matching (e.g., by stage of disease or age) was used. Specify the time period from which cases were taken, the end of the follow-up period, and the median follow-up time.	Precisely define all clinical endpoints examined.	List all candidate variables initially examined or considered for inclusion in models.	Give rationale for sample size; if the study was designed to detect a specified effect size, give the target power and effect size.	Specify all statistical methods, including details of any variable selection procedures and other model-building issues, how model assumptions were verified, and how missing data were handled.	Clarify how marker values were handled in the analyses; if relevant, describe methods used for cutpoint determination.	Describe the flow of patients through the study, including the number of patients included in each stage of the analysis (a diagram may be helpful) and reasons for dropout. Specifically, both overall and for each subgroup extensively examined report the numbers of patients and the number of events.	Report distributions of basic demographic characteristics (at least age and sex), standard (disease-specific) prognostic variables, and tumor marker, including numbers of missing values.	Show the relation of the marker to standard prognostic variables.	Present univariable analyses showing the relation between the marker and outcome, with the estimated effect (e.g., hazard ratio and survival probability). Preferably provide similar analyses for all other variables being analyzed. For the effect of a tumor marker on a time-to-event outcome, a Kaplan-Meier plot is recommended.	For key multivariable analyses, report estimated effects (e.g., hazard ratio) with confidence intervals for the marker and, at least for the final model, all other variables in the model.	Among reported results, provide estimated effects with confidence intervals from an analysis in which the marker and standard prognostic variables are included, regardless of their statistical significance.	If done, report results of further investigations, such as checking assumptions, sensitivity analyses, and internal validation.	Interpret the results in the context of the pre-specified hypotheses and other relevant studies; include a discussion of limitations of the study.	Discuss implications for future research and clinical value.
19	S100A7 overexpression is a predictive marker for high risk of malignant transformation in oral dysplasia.	2014	Kaur J, Matta A, Kak I, Srivastava G, Assi J, Leong I, Witterick I, Colgan TJ, Macmillan C, Siu KW, Walfish PG, Ralhan R.	Int J Cancer. 2014 Mar 15;134(6):1379-88. doi: 10.1002/ijc.28473. Epub 2013 Oct 8.	S100A7	Protein S100-A7	2	2	2	2	2	2	2	2	0	1 (How missing data were handled?)	2	2	1 (They do not report missing data)	2	2	2	1 (Only markers)	0 (Discussion)	2	2
22	Expression of cancer stem cell markers ALDH1 and Bmi1 in oral erythroplakia and the risk of oral cancer.	2013	Feng JQ, Xu ZY, Shi LJ, Wu L, Liu W, Zhou ZT.	J Oral Pathol Med. 2013 Feb;42(2):148-53. doi: 10.1111/j.1600-0714.2012.01191.x. Epub 2012 Jun 23.	ALDH1	Retinal dehydrogenase 1	2	2	2	2	2	2	2	2	0	1 (How missing data were handled?)	2	2	1 (They do not report missing data)	2	2	2	2	0 (Discussion)	2	2
27	Podoplanin expression in oral leukoplakia: tumorigenic role.	2013	de Vicente JC, Rodrigo JP, Rodriguez-Santamarta T, Lequerica-FernÃ¡ndez P, Allonca E, GarcÃ­a-Pedrero JM.	Oral Oncol. 2013 Jun;49(6):598-603. doi: 10.1016/j.oraloncology.2013.02.008. Epub 2013 Mar 7.	Podoplanin	Podoplanin	2	1 (No exclusion criteria)	2	2	2	2	2	1 (Factors that were significant by univariate analysis)	0	1 (How missing data were handled?)	2	2	1 (They do not report missing data)	2	2	2	2	0 (Discussion)	1 (They do not state the limitations of the study)	2
28	Expression patterns of cancer stem cell markers ALDH1 and CD133 correlate with a high risk of malignant transformation of oral leukoplakia.	2013	Liu W, Wu L, Shen XM, Shi LJ, Zhang CP, Xu LQ, Zhou ZT.	Int J Cancer. 2013 Feb 15;132(4):868-74. doi: 10.1002/ijc.27720. Epub 2012 Jul 30.	ALDH1 and CD133	Aldehyde dehydrogenase, cytosolic 1 and Prominin-1	2	1 (No exclusion criteria)	2	2	2	2	2	1 (Factors that were significant by univariate analysis)	0	1 (How missing data were handled?)	2	2	2	2	2	2	1 (Only markers)	0 (Discussion)	1 (They do not state the limitations of the study)	2
					***REMARK items=	0 - No
						1 - Partial
						2 - Yes

## Sheet: 4 - SciCurve trends
[Biomarker] and [Oral dysplasia]
Publications						Citations
	S100A7	ALDH1A1	PROM1	PDPN			S100A7	ALDH1A1	PROM1	PDPN
All	4	5	3	11		All	5	5	3	18
2018	1	1	1	2		2018	0	0	0	1
2017	1	1	0	1		2017	0	0	0	3
2016	0	0	0	2		2016	0	2	0	2
2015	0	0	0	1		2015	1	1	1	4
2014	1	2	1	0		2014	1	0	0	4
2013	0	0	0	1		2013	1	1	1	4
2012	0	1	1	2		2012	1	1	1	0
2011	0	0	0	2		2011	1	0	0	0
2010	1	0	0	0		2010	0	0	0	0
2009	0	0	0	0		2009	0	0	0	0
2008	0	0	0	0		2008	0	0	0	0
2007	0	0	0	0		2007	0	0	0	0
2006	0	0	0	0		2006	0	0	0	0
2005	0	0	0	0		2005	0	0	0	0
2004	0	0	0	0		2004	0	0	0	0
2003	0	0	0	0		2003	0	0	0	0
2002	0	0	0	0		2002	0	0	0	0
2001	0	0	0	0		2001	0	0	0	0
2000	0	0	0	0		2000	0	0	0	0
1999	0	0	0	0		1999	0	0	0	0
1998	0	0	0	0		1998	0	0	0	0
https://scicurve.com/trends/S100A7%20oral%20dysplasia,ALDH1%20oral%20dysplasia,CD133%20oral%20dysplasia,Podoplanin%20oral%20dysplasia
2018-06-28
[Biomarker] and [Oral cancer]
Publications						Citations
	S100A7	ALDH1A1	PROM1	PDPN		Year	S100A7	ALDH1A1	PROM1	PDPN
All	12	50	58	65		All	5	67	138	168
2018	1	10	8	12		2018	0	20	27	32
2017	1	12	11	5		2017	0	11	22	33
2016	3	7	3	9		2016	0	12	19	21
2015	3	5	8	10		2015	1	9	13	20
2014	2	4	4	5		2014	1	6	16	15
2013	0	7	7	3		2013	1	6	15	17
2012	0	4	7	9		2012	1	3	14	8
2011	1	1	6	2		2011	1	0	6	8
2010	1	0	2	4		2010	0	0	3	6
2009	0	0	0	1		2009	0	0	1	2
2008	0	0	1	3		2008	0	0	2	1
2007	0	0	1	0		2007	0	0	0	2
2006	0	0	0	1		2006	0	0	0	1
2005	0	0	0	0		2005	0	0	0	1
2004	0	0	0	0		2004	0	0	0	1
2003	0	0	0	1		2003	0	0	0	0
2002	0	0	0	0		2002	0	0	0	0
2001	0	0	0	0		2001	0	0	0	0
2000	0	0	0	0		2000	0	0	0	0
1999	0	0	0	0		1999	0	0	0	0
1998	0	0	0	0		1998	0	0	0	0
https://scicurve.com/trends/S100A7%20oral%20cancer,ALDH1%20oral%20cancer,CD133%20oral%20cancer,Podoplanin%20oral%20cancer
2018-06-28

## Sheet: 5 - Dictionary
Dictionary
Ryyan_reason (abstract)
1 - Duplicated
2 - Out of goal
3 - Wrong article type
Ryyan_decision (abstract)
1 - Exclusion
2 - Inclusion
Progression from oral dysplasia to cancer (full text, multivariate model, dysplasia vs. dysplasia)
1 - No
2 - Yes
Progression_decision (full text, multivariate model, dysplasia vs. dysplasia)
1 - Exclusion
2 - Inclusion
Significant
NS - non significant
